# THE AMERICAN JOURNAL OF PSYCHIATRY

---

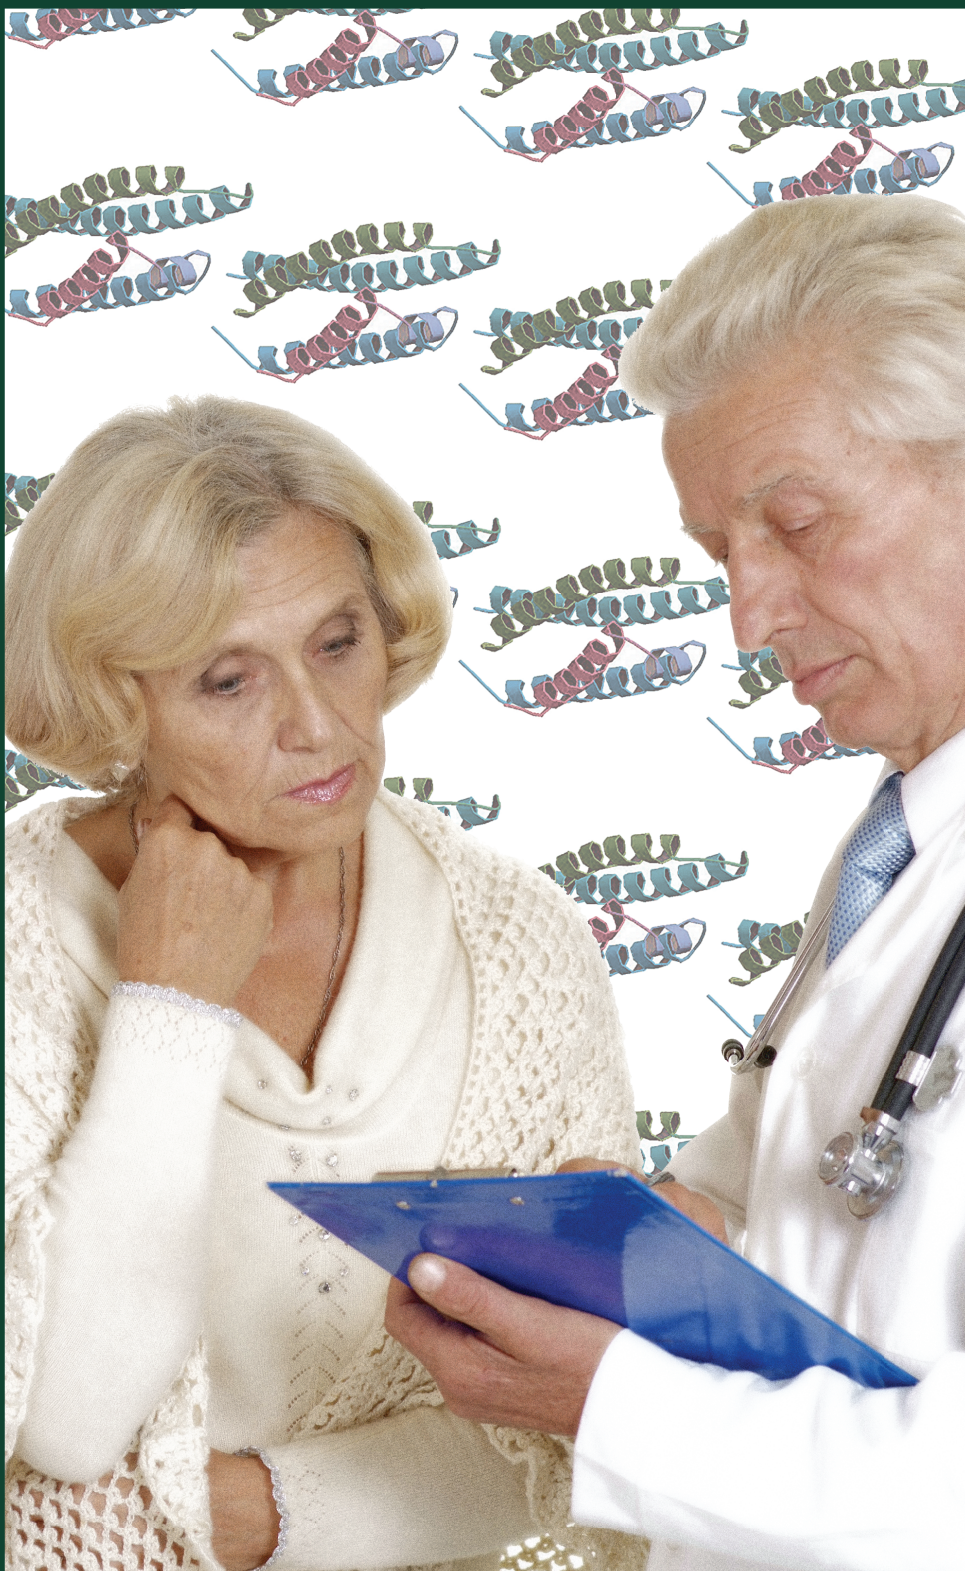

Lurasidone as Adjunctive Therapy  
With Lithium or Valproate for the  
Treatment of Bipolar I Depression

Antony Loebel, M.D., et al.

169

Do Comorbid Anxiety Disorders  
Moderate the Effects of  
Psychotherapy for Bipolar  
Disorder? Results From STEP-BD

Thilo Deckersbach, Ph.D., et al.

178

◀ Effect of Knowledge of APOE  
Genotype on Subjective and  
Objective Memory Performance in  
Healthy Older Adults

Tara T. Lineweaver, Ph.D., et al.

201

Genetic and Family and  
Community Environmental Effects  
on Drug Abuse in Adolescence

Kenneth S. Kendler, M.D., et al.

209

**February 2014**

**Volume 171 • Number 2**

---

Official Journal of the  
AMERICAN PSYCHIATRIC ASSOCIATION

---

[ajp.psychiatryonline.org](http://ajp.psychiatryonline.org)
