# THE AMERICAN JOURNAL OF PSYCHIATRY

## En este número

A18

### Perspectivas

#### Editoriales

- 131 **Lurasidona y trastorno bipolar**  
R.H. Belmaker
- 134 **Asistencia informática para el diagnóstico de la ansiedad y la depresión**  
Helena Chmura Kraemer y Robert Freedman  
**Audio**
- 137 **Centrando la atención en el cerebro que envejece: ¿Estamos listos para la medicina personalizada?**  
Jason Karlawish y Robert C. Green
- 140 **Comunidad, hermanos, heredabilidad y el riesgo de abuso de drogas**  
Christian Hopfer

#### Comentario

- 142 **Comité clínico y de salud pública del DSM-5: Retos y consideraciones**  
Joel Yager y John S. McIntyre

#### Conferencia de Caso Clínico

- 145 **Desarrollo de la psicosis esquizoafectiva en el curso de un trabajo a largo plazo como sanador espiritual: ¿Coincidencia o causalidad?**  
Julia Sadzio, Henning Vieker, Oliver Gruber, y David Zilles

#### Imágenes en Psiquiatría

- 149 **El viejo y el nuevo Hospital New Eastern State, en Lexington, Kentucky**  
Jose de Leon, Shane Shoemaker, y Allen Brenzel

#### Resúmenes y Reseñas

- 151 **Tratamientos farmacológicos del delirium no derivado de la abstinencia de sustancias: Una revisión sistemática de ensayos prospectivos**  
Joseph I. Friedman, Laili Soleimani, Daniel P. McGonigle, Claudine Egol, y Jeffrey H. Silverstein

## Nuevas Investigaciones

### Artículos

- 160 **Monoterapia con lurasidona en el tratamiento de la depresión bipolar I: Un estudio doble ciego, aleatorizado, controlado con placebo**  
Antony Loebel, Josephine Cucchiari, Robert Silva, Hans Kroger, Jay Hsu, Kaushik Sarma, y Gary Sachs  
**Audio** **Guías clínicas** **Editorial**
- 169 **La lurasidona como terapia adyuvante con litio o valproato para el tratamiento de la depresión bipolar I: Un estudio doble ciego, aleatorizado, controlado con placebo**  
Antony Loebel, Josephine Cucchiari, Robert Silva, Hans Kroger, Kaushik Sarma, Jane Xu, y Joseph R. Calabrese **Audio** **Guías clínicas** **Editorial**
- 178 **¿Moderan los trastornos de ansiedad comórbidos los efectos de la psicoterapia para el trastorno bipolar? Resultados del STEP-BD**  
Thilo Deckersbach, Amy T. Peters, Louisa Sylvia, Anna Urdahl, Pedro V.S. Magalhães, Michael W. Otto, Ellen Frank, David J. Miklowitz, Michael Berk, Gustavo Kinrys, y Andrew Nierenberg **Audio** **Editorial**
- 187 **Desarrollo de la prueba CAT-ANX: Una prueba computarizada adaptable para la ansiedad**  
Robert D. Gibbons, David J. Weiss, Paul A. Pilkonis, Ellen Frank, Tara Moore, Jong Bae Kim, y David J. Kupfer **Audio** **Editorial**
- 195 **Efecto del uso de medicamentos antidepressivos sobre el procesamiento de la información emocional en la depresión mayor**  
Tony T. Wells, Elise M. Clerkin, Alissa J. Ellis, y Christopher G. Beevers
- 201 **Efecto del conocimiento del genotipo APOE en el rendimiento de la memoria subjetiva y objetiva en adultos mayores sanos**  
Tara T. Lineweaver, Mark W. Bondi, Douglas Galasko, y David P. Salmon **Audio** **EMC** **Guías clínicas** **Editorial**
- 209 **Efectos genéticos y del entorno familiar y comunitario en el abuso de drogas en la adolescencia: Un estudio nacional sueco de gemelos y hermanos**  
Kenneth S. Kendler, Hermine H. Maes, Kristina Sundquist, Henrik Ohlsson, y Jan Sundquist  
**Audio** **EMC** **Guías clínicas** **Editorial**

**218 Un estudio nacional sobre el riesgo de enfermedades autoinmunes en personas con un historial personal o familiar de esquizofrenia y psicosis relacionada con la misma**

Michael E. Benros, Marianne G. Pedersen, Helle Rasmussen, William W. Eaton, Merete Nordentoft, y Preben B. Mortensen **Audio** **EMC** **Guías clínicas**

### Comunicados y Actualizaciones

#### Cartas al Editor

- 227** Retos a la hora de estimar el riesgo de mortalidad que comportan los antipsicóticos en personas con la enfermedad de Alzheimer
- Los servicios de tratamiento asistido de pacientes externos y la influencia del tratamiento obligatorio
- Diabetes mellitus tipo 1 y riesgo de mortalidad en pacientes con anorexia nerviosa

#### Reseñas Bibliográficas

- 230** Triumphs of Experience: The Men of the Harvard Grant Study [Triunfos de la experiencia: Los hombres del Estudio Grant de Harvard]
- A Disability of the Soul: An Ethnography of Schizophrenia and Mental Illness in Contemporary Japan [Una discapacidad del alma: Una etnografía de la esquizofrenia y la enfermedad mental en el Japón contemporáneo]

Mind, Modernity, Madness: The Impact of Culture on Human Experience [Mente, modernidad, locura: El impacto de la cultura en la experiencia humana]

Autism and Other Neurodevelopmental Disorders [Autismo y otros trastornos del neurodesarrollo]

#### 234 Libros Recibidos

#### Otros Temas de Interés

- 235** Actos oficiales
- 245** Educación Médica Continuada
- A4** Directivos de la American Psychiatric Association
- A6** Calendario
- A9** Contenidos del *British Journal of Psychiatry*
- A10** Contenidos del *Shanghai Archives of Psychiatry*

#### Cubierta

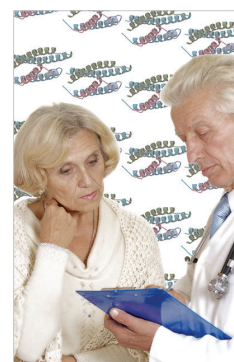

- Audio** artículo en AJP Audio: archivo .mp3 descargable de [ajp.psychiatryonline.org](http://ajp.psychiatryonline.org)
- Guías clínicas** este artículo ofrece guías clínicas (ver pagina "En este Número" o al final del artículo)
- EMC** existe un curso en línea que cubre los contenidos de este artículo para los suscriptores del programa de cursos de EMC del AJP
- Editorial** este artículo se discute en uno de los editoriales de este número

La Tabla de Contenidos de Este Número Está Disponible en Español

*(This issue's Table of Contents is available in Spanish)*

Presented in collaboration with the Office of Global Health, UMDNJ-Robert Wood Johnson Medical School

Translation courtesy of

Sergi Casals, M.A.

*Garuna, Medellin, Colombia ([www.garunaeditors.com](http://www.garunaeditors.com))*

Carlos Lopez Jaramillo, M.D.

*Universidad de Antioquia, Medellin, Colombia*

Javier I. Escobar, M.D., M.Sc.

*UMDNJ-Robert Wood Johnson Medical School*

Consulte *The American Journal of Psychiatry* en línea en [ajp.psychiatryonline.org](http://ajp.psychiatryonline.org)

**NEW**

Also Included: Translations of selected abstracts!

*(Support for this effort provided by AstraZeneca-Colombia.)*

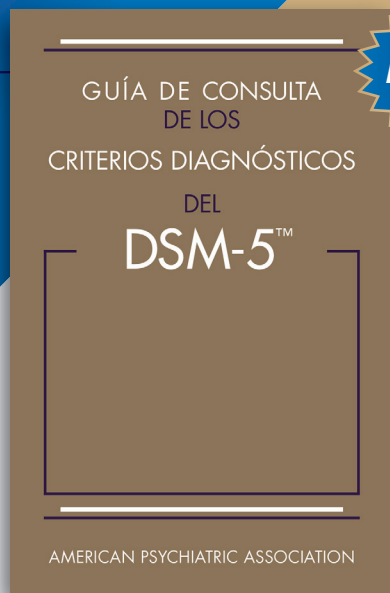

**Nuevo!**

## Guía de consulta de los criterios diagnósticos del DSM-5™

**Spanish Edition of the Desk Reference to the Diagnostic Criteria From DSM-5™**

American Psychiatric Association

La Guía de consulta de los criterios diagnósticos del DSM-5™ es una ayuda concisa y asequible para la referencia psiquiátrica fundamental, el DSM-5™. Incluye la clasificación diagnóstica completa revisada, así como todos los criterios diagnósticos del DSM-5™ en un formato fácil de utilizar. Esta cómoda referencia proporciona un acceso rápido a la información esencial para emitir un diagnóstico. Diseñado como complemento del DSM-5™, esta cómoda guía ayudará a los profesionales de la salud mental a incorporar los criterios diagnósticos del DSM-5™ en sus diagnósticos.

El Manual diagnóstico y estadístico de los trastornos mentales es la máxima referencia autorizada para la práctica clínica en el campo de la salud mental. Los cambios estructurales y diagnósticos de la quinta edición son un material que todos los clínicos "deben conocer". La Guía de consulta de los criterios diagnósticos del DSM-5™ condensa la información diagnóstica actualizada esencial de este manual para ofrecer a los clínicos un recurso inestimable para diagnosticar con eficacia los trastornos mentales, desde el de mayor prevalencia al menos frecuente.

2014 • 490 pages • ISBN 978-0-89042-551-0 • Paperback • \$69.00 • Item #2551

*También disponible en Español*

### Aplicación para celular de los Criterios Diagnósticos del DSM-5™

La Aplicación Móvil de Criterios Diagnósticos DSM-5™ proporciona a los profesionales, investigadores y estudiantes de la salud mental un rápido acceso a códigos y criterios vitales de DSM para que puedan integrar por completo los nuevos datos en su práctica y sus estudios. Los usuarios tienen acceso completo fuera de línea a todos los conjuntos de criterios, además de acceso en línea a vídeos, comentarios y recursos de apoyo. Sus poderosas herramientas de personalización y de búsqueda ayudan y mejoran la valoración de las presentaciones de los síntomas en diversos entornos clínicos y administrativos.

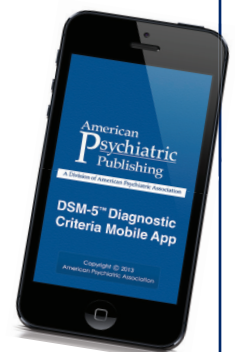

Ahora disponible para dispositivos iOS y Android.

## Monoterapia con lurasidona en el tratamiento de la depresión bipolar I: Un estudio doble ciego, aleatorizado, controlado con placebo

Antony Loebel, M.D.  
Josephine Cucchiari, Ph.D.  
Robert Silva, Ph.D.  
Hans Kroger, M.P.H., M.S.  
Jay Hsu, Ph.D.  
Kaushik Sarma, M.D.  
Gary Sachs, M.D.

**Objetivo:** Los autores evaluaron la eficacia y la seguridad de la lurasidona en el tratamiento de pacientes con episodios de depresión mayor asociados al trastorno bipolar I.

**Método:** A los pacientes se les asignó aleatoriamente un tratamiento doble ciego con lurasidona (20–60 mg/día [N=166] o 80–120 mg/día [N=169]) o con placebo (N=170) durante 6 semanas. Los puntos finales de medición primarios y secundarios clave fueron: el cambio desde el inicio hasta la semana

6 en la escala de evaluación de depresión de Montgomery-Åsberg (MADRS) y el puntaje de severidad de la depresión en la escala de impresiones clínicas globales para la enfermedad bipolar (CGI-BP), respectivamente.

**Resultados:** Con el tratamiento con lurasidona, el promedio de los puntajes totales en la escala MADRS se redujo significativamente en la semana 6, tanto para el grupo de 20–60 mg/día (–15,4; tamaño de efecto=0,1) como para el grupo de 80–120 mg/día (–15,4; tamaño de efecto=0,51) en comparación con el placebo (–10,7). De modo similar, el tratamiento con lurasidona tuvo como resultado una reducción significativa, al final del estudio, de la severidad de la depresión de acuerdo con el puntaje de la escala CGI-BP tanto para el grupo de 20–60 mg/día (–1,8; tamaño de efecto=0,61) como para el de 80–120 mg/día (–1,7; tamaño de efecto=0,50) en comparación con el placebo (–1,1). En

los dos grupos tratados con lurasidona también se observaron mejoras significativas en comparación con el placebo en síntomas de ansiedad y en las medidas reportadas por los mismos pacientes sobre la calidad de vida y el deterioro funcional. Las tasas de discontinuación debida a eventos adversos fueron similares en los tres grupos: el de 20–60 mg/día (6,6%), el de 80–120 mg/día (5,9%), y el de placebo (6,5%). Los eventos adversos más frecuentes asociados con la lurasidona fueron náuseas, dolor de cabeza, acatisia y somnolencia. Con la lurasidona se observaron cambios mínimos de peso, lípidos y medidas de control glucémico.

**Conclusión:** La monoterapia con lurasidona en el rango de dosis de 20–120 mg/día redujo significativamente los síntomas depresivos en pacientes con depresión bipolar I. La lurasidona fue bien tolerada, con pocos cambios de peso o de los parámetros metabólicos.

(*Am J Psychiatry* 2014; 171:160–168)

## La lurasidona como terapia adyuvante con litio o valproato para el tratamiento de la depresión bipolar I: Un estudio doble ciego, aleatorizado, controlado con placebo

Antony Loebel, M.D.  
Josephine Cucchiari, Ph.D.  
Robert Silva, Ph.D.  
Hans Kroger, M.P.H., M.S.  
Kaushik Sarma, M.D.  
Jane Xu, Ph.D.  
Joseph R. Calabrese, M.D.

**Objetivo:** Se han reportado pocos estudios que apoyen la eficacia de la terapia adyuvante para pacientes con depresión bipolar I que hayan tenido una respuesta insuficiente a la monoterapia con agentes estabilizadores del ánimo. Los autores investigaron la eficacia de la lurasidona, un agente antipsicótico nuevo, como terapia adyuvante con litio o valproato para el tratamiento de la depresión bipolar I.

**Método:** Los pacientes fueron asignados aleatoriamente para recibir 6 se-

manas de tratamiento adyuvante doble ciego con lurasidona (N=183) o placebo (N=165), añadidos a niveles terapéuticos de litio o de valproato. Los puntos finales de medición primarios y secundarios clave fueron: el cambio desde el inicio hasta la semana 6 en la escala de evaluación de depresión de Montgomery-Åsberg (MADRS) y el puntaje de severidad de la depresión en la escala de impresiones clínicas globales para la enfermedad bipolar (CGI-BP), respectivamente.

**Resultados:** Con el tratamiento con lurasidona, el promedio de los puntajes totales en la escala MADRS se redujo significativamente en la semana 6 en comparación con el tratamiento con placebo (–17,1 versus –13,5; tamaño de efecto=0,34). De modo similar, el tratamiento con lurasidona tuvo como resultado una reducción significativamente mayor, al final del estudio, de la severidad de la depresión de acuerdo con el puntaje de la escala CGI-BP en

comparación con el placebo (–1,96 versus –1,51; tamaño de efecto=0,36), así como una mejora significativamente mayor de los síntomas de ansiedad y de las medidas de calidad de vida y de deterioro funcional reportadas por los propios pacientes. Las tasas de discontinuación debida a eventos adversos fueron del 6,0% y el 7,9% en los grupos de lurasidona y placebo respectivamente. Los eventos adversos reportados con mayor frecuencia para la lurasidona fueron náuseas, somnolencia, temblor, acatisia e insomnio. Durante el tratamiento con lurasidona se observaron cambios mínimos de peso, lípidos y medidas de control glucémico.

**Conclusiones:** En pacientes con depresión bipolar I, el tratamiento adyuvante con lurasidona añadido a litio o valproato mejoró significativamente los síntomas depresivos y en general fue bien tolerado.

(*Am J Psychiatry* 2014; 171:169–177)

## ¿Moderan los trastornos de ansiedad comórbidos los efectos de la psicoterapia para el trastorno bipolar? Resultados del STEP-BD

Thilo Deckersbach, Ph.D.  
Amy T. Peters, B.A.  
Louisa Sylvia, Ph.D.  
Anna Urdahl, B.A.  
Pedro V.S. Magalhães, M.D., Ph.D.  
Michael W. Otto, Ph.D.  
Ellen Frank, Ph.D.  
David J. Miklowitz, Ph.D.  
Michael Berk, M.D., Ph.D.  
Gustavo Kinrys, M.D.  
Andrew Nierenberg, M.D.

**Objetivo:** Por lo menos el 50% de las personas con trastorno bipolar tienen un trastorno de ansiedad de por vida. En las personas con trastorno bipolar y trastorno de ansiedad simultáneo, la enfermedad es de mayor duración y severidad, y su respuesta al tratamiento es menor. El estudio exploró si la ansiedad comórbida en algún momento de la vida en pacientes bipolares modera el resultado del tratamiento con psicoterapia.

**Método:** En el ensayo aleatorizado y controlado de psicoterapia para la depresión bipolar del Programa para la Mejoría Sistemática del Tratamiento del

Trastorno Bipolar (STEP-BD), los participantes recibieron hasta 30 sesiones de psicoterapia intensiva (terapia centrada en la familia, terapia de ritmo interpersonal y social o terapia cognitivo-conductual) o atención colaborativa, un tratamiento de comparación de tres sesiones, y farmacoterapia. Haciendo uso del número necesario para tratar, calculamos los tamaños de efecto para analizar la relación entre los trastornos de ansiedad presentes en algún momento de la vida y las tasas de recuperación en los diferentes grupos de tratamiento después de 1 año.

**Resultados:** En el análisis se incluyeron un total de 269 pacientes (113 mujeres) con un trastorno comórbido de ansiedad en algún momento de la vida (N=177) o sin ningún trastorno comórbido de ansiedad en algún momento de la vida (N=92). Los participantes con un trastorno comórbido de ansiedad en algún momento de la vida tendieron a recuperarse más con psicoterapia que con atención colaborativa (el 66% en comparación con el 49% se recuperaron en un año; número necesario para tratar=5,88; efecto de pequeño a mediano). Para los pacientes sin ningún trastorno de ansiedad en ningún mo-

mento de la vida, no hubo diferencias entre las tasas de recuperación con psicoterapia y con atención colaborativa (se recuperaron el 64% comparado con el 62%; número necesario para tratar=50; efecto pequeño). Los participantes con un trastorno de ansiedad en algún momento de la vida se beneficiaron más de la psicoterapia intensiva que de la atención colaborativa (se recuperaron el 84% comparado con el 53%; número necesario para tratar=3,22; efecto de mediano a grande), mientras que en los pacientes con múltiples trastornos de ansiedad no se observó ninguna diferencia en la respuesta a los dos tratamientos (se recuperaron el 54% comparado con el 46%; número necesario para tratar=12,5; efecto pequeño).

**Conclusiones:** Los pacientes deprimidos con trastorno bipolar y trastorno comórbido de ansiedad pueden necesitar especialmente psicoterapia adicional para tratar la depresión aguda. Es necesario replicar estos resultados en estudios que estratifiquen a los pacientes bipolares para tratamientos basados en la presencia o ausencia de ansiedad comórbida.

(*Am J Psychiatry* 2014; 171:178–186)

## Desarrollo de la prueba CAT-ANX: Una prueba computarizada adaptable para la ansiedad

Robert D. Gibbons, Ph.D.  
David J. Weiss, Ph.D.  
Paul A. Pilkonis, Ph.D.  
Ellen Frank, Ph.D.  
Tara Moore, M.A., M.P.H.  
Jong Bae Kim, Ph.D.  
David J. Kupfer, M.D.

**Objetivo:** Los autores desarrollaron una prueba computarizada adaptable para la ansiedad, que disminuye la carga para el paciente y el clínico y aumenta la precisión de medición.

**Método:** Se reclutaron un total de 1.614 personas con y sin trastorno de ansiedad generalizada de una clínica psiquiátrica y un centro de salud mental comunitario. El presente estudio se centró en el

desarrollo del inventario computarizado adaptable para evaluar la ansiedad (Computerized Adaptive Testing-Anxiety Inventory, CAT-ANX). Se utilizó la entrevista clínica estructurada del DSM-IV para obtener clasificaciones diagnósticas del trastorno de ansiedad generalizada y el trastorno depresivo mayor.

**Resultados:** En promedio se necesitaron 12 ítems por sujeto para obtener un error estándar de 0,3 en la estimación de la severidad de la ansiedad y mantener una correlación de 0,94 con el puntaje total de la prueba de 431 ítems. Los puntajes obtenidos con CAT-ANX estaban estrechamente relacionados con la probabilidad de un diagnóstico de trastorno de ansiedad generalizada. Utilizando ambas herramientas –el inventario computarizado adaptable para evaluar la depresión como el CAT-ANX,

se pueden predecir con precisión el trastorno depresivo mayor y el trastorno de ansiedad generalizada concomitantes.

**Conclusiones:** La medición tradicional establece un número fijo de ítems, pero permite que varíe la incertidumbre de la medición. La prueba computarizada adaptable establece una incertidumbre de la medición fija y permite variabilidad en el número de ítems y su contenido, lo que conlleva una disminución drástica del número de ítems que se necesitan para un nivel fijo de incertidumbre de la medición. Se examinan aplicaciones potenciales para un análisis económico, eficiente y preciso de la ansiedad en contextos de atención primaria, ensayos clínicos, epidemiología psiquiátrica, genética molecular, niños y otras culturas.

(*Am J Psychiatry* 2014; 171:187–194)



## Efecto del uso de medicamentos antidepresivos sobre el procesamiento de la información emocional en la depresión mayor

Tony T. Wells, Ph.D.  
Elise M. Clerkin, Ph.D.  
Alissa J. Ellis, Ph.D.  
Christopher G. Beevers, Ph.D.

**Objetivo:** La administración aguda de medicamentos antidepresivos aumenta el procesamiento de la información emocional para la información positiva, tanto en las personas deprimidas como en las sanas. Este efecto probablemente es relevante para las acciones terapéuticas de estos medicamentos, pero no se ha estudiado en pacientes con trastorno depresivo mayor que estén tomando antidepresivos tal como se suelen prescribir en la comunidad.

**Método:** Los autores utilizaron el seguimiento de los movimientos oculares para examinar los efectos de los medi-

camentos antidepresivos en la atención selectiva a los estímulos emocionales en una muestra de 47 pacientes con trastorno depresivo mayor (21 medicados y 26 no medicados) y un grupo equivalente de comparación de 47 sujetos sin depresión. Los participantes completaron una tarea de seguimiento de movimientos oculares de visualización pasiva que evaluaba la atención selectiva a estímulos positivos, disfóricos, amenazantes y neutrales, además de ofrecer información sobre la medicación y las medidas de auto-reporte de la severidad de la depresión y la ansiedad.

**Resultados:** En los participantes deprimidos que estaban tomando antidepresivos y en los sujetos de comparación que no estaban deprimidos se observó una mayor duración de la mirada total y más fijaciones en los estímulos positivos en comparación con

los pacientes deprimidos no medicados. Los participantes deprimidos que estaban tomando medicación también tuvieron menos fijaciones en los estímulos disfóricos, en comparación con los participantes deprimidos que no estaban tomando medicación.

**Conclusiones:** Los antidepresivos, tal como se prescriben en la comunidad a los pacientes con depresión, parecen modificar el procesamiento de la información emocional cuando no hay diferencias en la severidad de la depresión. Estos resultados son consistentes con los trabajos anteriores e indican un efecto robusto de los antidepresivos en el procesamiento de la información positiva. Igualmente, ofrecen más evidencia de que modificar el procesamiento de la información es un potencial mecanismo de acción de los medicamentos antidepresivos.

(*Am J Psychiatry* 2014; 171:195–200)

## Efecto del conocimiento del genotipo APOE en el desempeño de la memoria subjetiva y objetiva en adultos mayores sanos

Tara T. Lineweaver, Ph.D.  
Mark W. Bondi, Ph.D.  
Douglas Galasko, M.D.  
David P. Salmon, Ph.D.

**Objetivo:** Recientemente se descubrió que tener conocimiento de que uno es portador del factor de riesgo de enfermedad de Alzheimer del alelo  $\epsilon 4$  de la apolipoproteína E (APOE) tiene poco riesgo psicológico a corto plazo. Los autores investigaron el impacto que tiene el conocimiento de que uno es portador del alelo de riesgo, utilizando evaluaciones subjetivas de la memoria y el rendimiento en pruebas de memoria objetiva en adultos mayores.

**Método:** Por medio de un diseño de casos y controles anidado, los autores

administraron pruebas objetivas de memoria visual y verbal y escalas de auto-evaluación de la función de la memoria a 144 adultos mayores cognitivamente normales (edades 52–89), portadores del genotipo APOE, que sabían ( $\epsilon 4+$ , N=25;  $\epsilon 4-$ , N=49) o no sabían ( $\epsilon 4+$ , N=25;  $\epsilon 4-$ , N=45) de su genotipo y del riesgo genético de enfermedad de Alzheimer antes de la evaluación neuropsicológica.

**Resultados:** Se observaron efectos significativos de interacción entre genotipo y conocimiento del mismo en varias escalas de evaluación y pruebas de recuerdo verbal inmediato y demorado. Los adultos mayores que sabían de su genotipo  $\epsilon 4+$  juzgaron su memoria con mayor dureza y tuvieron un peor rendimiento en comparación con los adultos que tenían el genotipo  $\epsilon 4+$  y no lo sabían. En contraste, los adultos mayores que

sabían de su genotipo  $\epsilon 4-$  juzgaron su memoria de manera más positiva que los adultos con el genotipo  $\epsilon 4-$  que no sabían que lo tenían, pero entre estos dos grupos no hubo diferencias de rendimiento en pruebas de memoria objetiva.

**Conclusiones:** Informar a adultos mayores de que tienen un genotipo APOE asociado con un mayor riesgo de enfermedad de Alzheimer puede tener consecuencias adversas en la percepción de sus habilidades de memoria y en su desempeño en pruebas de memoria objetiva. El conocimiento que los pacientes tienen de su genotipo y del riesgo de enfermedad de Alzheimer es un aspecto que se debería tener en cuenta al evaluar la cognición en los adultos mayores.

(*Am J Psychiatry* 2014; 171:201–208)

## Efectos genéticos y del entorno familiar y comunitario en el abuso de drogas en la adolescencia: Un estudio nacional sueco de gemelos y hermanos

Kenneth S. Kendler, M.D.  
Hermine H. Maes, Ph.D.  
Kristina Sundquist, M.D., Ph.D.  
Henrik Ohlsson, Ph.D.  
Jan Sundquist, M.D., Ph.D.

**Objetivo:** Con datos obtenidos de los registros de toda Suecia, los autores investigaron los factores de riesgo genéticos y ambientales en la etiología del abuso de drogas, utilizando un modelo de hermanos gemelos. Los autores hicieron seguimiento de análisis epidemiológicos para identificar factores ambientales compartidos que tuvieran influencia en el abuso de drogas.

**Método:** Para definir el abuso de drogas se emplearon registros médicos, legales y farmacéuticos públicos. Se consiguieron pares de gemelos y de hermanos de los registros nacionales de gemelos y genealógicos. La información sobre el lugar de residencia de parejas

de hermanos—en la misma casa, área residencial pequeña o municipio—se obtuvo de la Oficina Central de Estadísticas de Suecia. Los autores predijeron que habría concordancia entre el abuso de drogas y los años de co-residencia hasta que el hermano mayor cumpliera 21 años, y que en los adolescentes que vivían con figuras parentales, el riesgo de abuso de drogas en el futuro estaría en función del estatus socio-económico a nivel familiar y del aislamiento social del vecindario.

**Resultados:** El modelo de hermanos gemelos de mejor ajuste predijo heredabilidad considerable del abuso de drogas en hombres (55%) y mujeres (73%), con un efecto de los factores ambientales compartidos por los hermanos sólo en los hombres y responsables solo del 23% de la varianza en riesgo. Por cada año de haber vivido en la misma casa, la probabilidad de concordancia en abuso de drogas entre hermanos aumentó entre el 2% y el 5%. Si no residían en la misma casa, la concordancia se predijo

a partir de la residencia en la misma área residencial pequeña o municipio. El riesgo de abuso de drogas se predijo tanto a partir del estatus socio-económico como del aislamiento social del vecindario. Al controlar el estatus socio-económico familiar, el riesgo de abuso de drogas aumentó un 2% por cada año de haber vivido en un vecindario de alto aislamiento social.

**Conclusiones:** Basándose en datos objetivos de registros, los autores encontraron que existe una alta posibilidad de que se herede el abuso de drogas. Gran parte del efecto que el entorno compartido tiene en el abuso de drogas proviene de influencias a nivel de la comunidad más que de influencias a nivel familiar. Los efectos genéticos que se han demostrado en los estudios de gemelos han llevado a análisis moleculares para dilucidar vías biológicas. Paralelamente, se pueden llevar a cabo estudios epidemiológicos para hacerles seguimiento a los efectos del entorno y aclarar los mecanismos sociales.

(*Am J Psychiatry* 2014; 171:209–217)

## Un estudio nacional sobre el riesgo de enfermedades autoinmunes en personas con un historial personal o familiar de esquizofrenia y psicosis relacionada con la misma

Michael E. Benros, M.D., Ph.D.  
Marianne G. Pedersen, M.Sc.  
Helle Rasmussen, M.Sc.  
William W. Eaton, Ph.D.  
Merete Nordentoft, Dr.Med.Sc.  
Preben B. Mortensen, Dr.Med.Sc.

**Objetivo:** En investigaciones anteriores se ha encontrado un mayor riesgo de esquizofrenia en personas con enfermedades autoinmunes y asociaciones menores pero significativas con un historial familiar de enfermedades autoinmunes. En este estudio se investiga, por primera vez, la asociación entre la esquizofrenia y las subsiguientes enfermedades autoinmunes (la temporalidad inversa) y de igual modo se considera el efecto de las infecciones, un posible factor de riesgo tanto de esquizofrenia como de enfermedades autoinmunes.

**Método:** Se juntaron registros de toda Dinamarca para conformar una cohorte de 3,83 millones de personas, de las que 39.364 tenían psicosis semejante a la esquizofrenia y 142.328 tenían una enfermedad autoinmune. Los datos se analizaron utilizando análisis de supervivencia y se ajustaron por año de calendario, edad y sexo.

**Resultados:** Las personas con esquizofrenia tuvieron un riesgo elevado de subsiguientes enfermedades autoinmunes, con un cociente de tasas de incidencia de 1,53 (CI 95%=1,46–1,62). Entre las personas que no habían tenido contacto con hospitales por infecciones, el efecto de tener esquizofrenia fue menor, con un cociente de tasas de incidencia más elevado, de 1,32 (CI 95%=1,22–1,43), para las enfermedades autoinmunes. Para las personas con esquizofrenia y contactos con hospitales por infecciones, el riesgo combinado

de enfermedades autoinmunes fue de 2,70 (CI 95%=2,51–2,89). Un historial familiar de esquizofrenia aumentaba ligeramente el riesgo general de desarrollar enfermedades autoinmunes (cociente de tasas de incidencia=1,06; CI 95%=1,02–1,09). En el 3,6% de las personas con esquizofrenia se desarrollaron enfermedades autoinmunes subsiguientes, y el 31% de las personas con enfermedades autoinmunes tenían un historial de esquizofrenia.

**Conclusiones:** El mayor riesgo de enfermedades autoinmunes subsiguientes en personas con esquizofrenia puede implicar manifestaciones neuropsiquiátricas de la enfermedad autoinmune no diagnosticada, tratamiento médico o estilo de vida asociado con la esquizofrenia, o mecanismos etiológicos comunes, como infecciones y factores genéticos compartidos.

(*Am J Psychiatry* 2014; 171:218–226)
